# Supplementary figures and images for: Experience-driven rate modulation is reinstated during hippocampal replay
Source: eLife journal article supplement (doi:10.7554/elife.79031), 2022-08-22

**A****Track Rate Shuffle**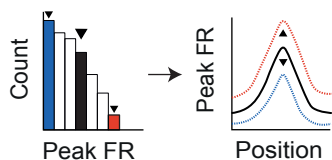**B****Replay Rate Shuffle**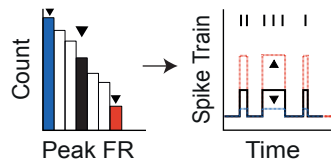**C**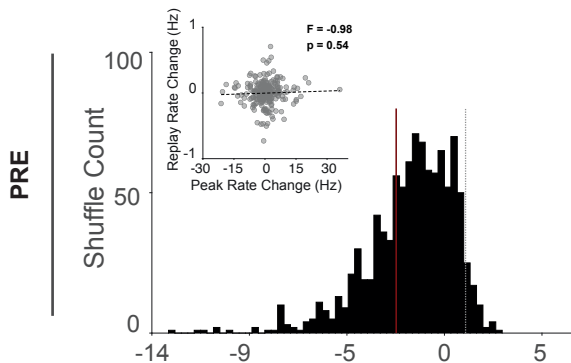**D**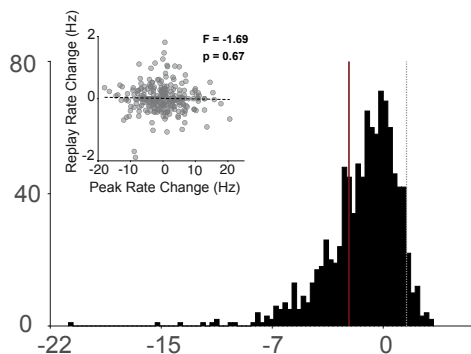**E**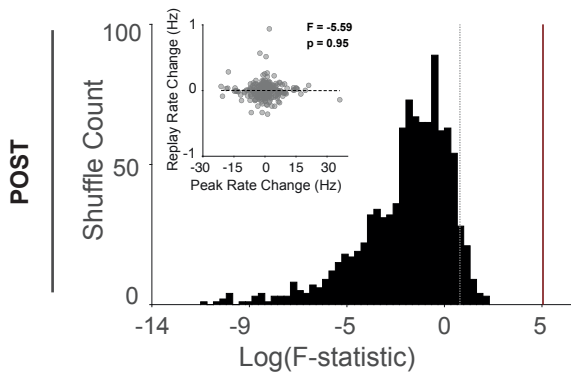**F**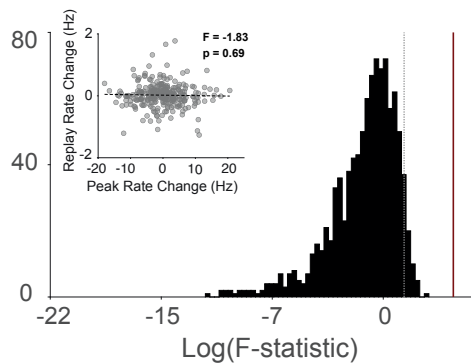

Supplement: supp [file elife-79031-supp-v1.zip]

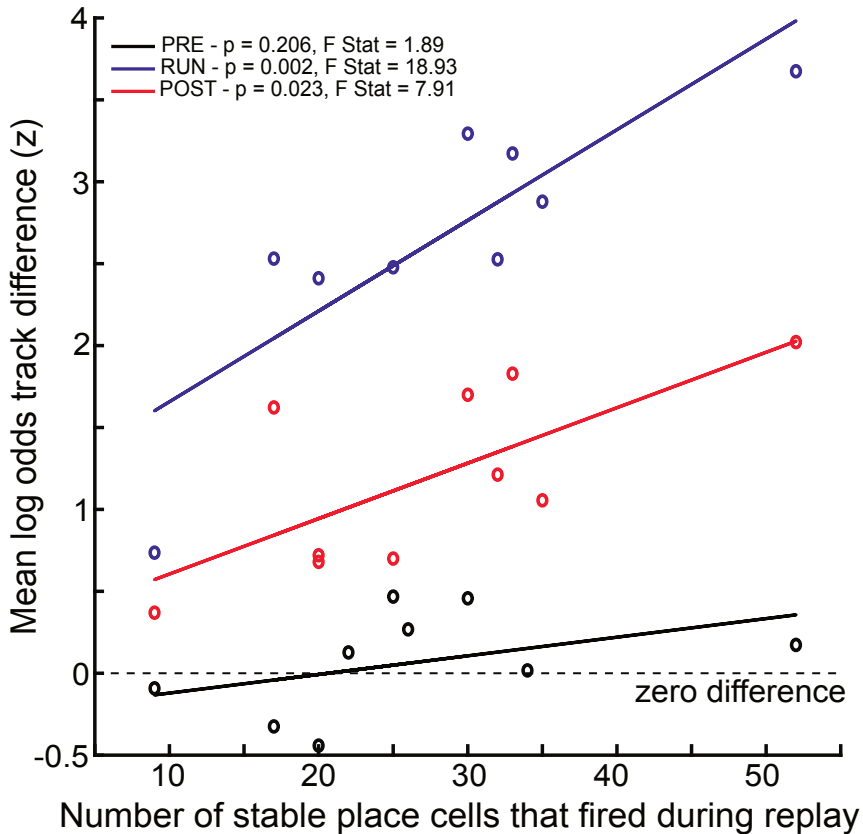

Supplement: supp [file elife-79031-supp-v1.zip]

**PRE****POST****A**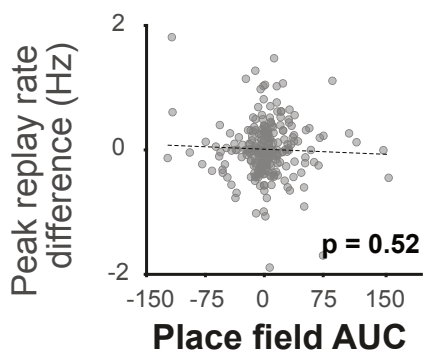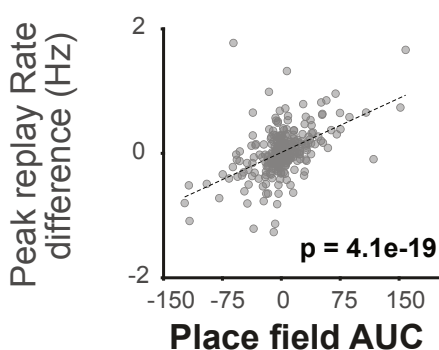**B**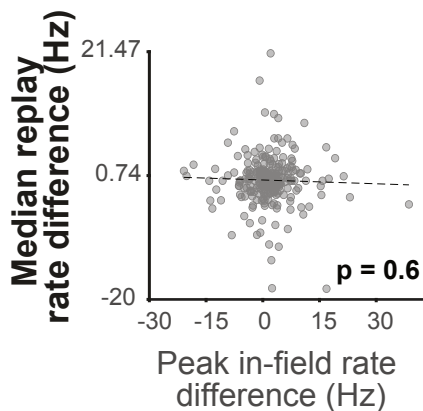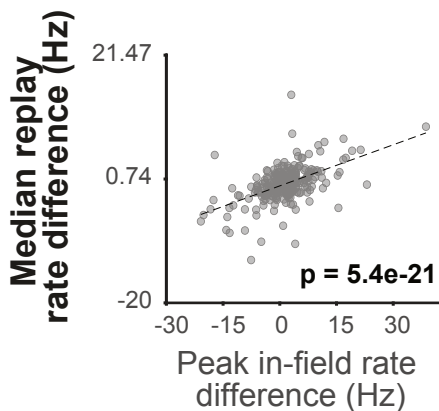**C**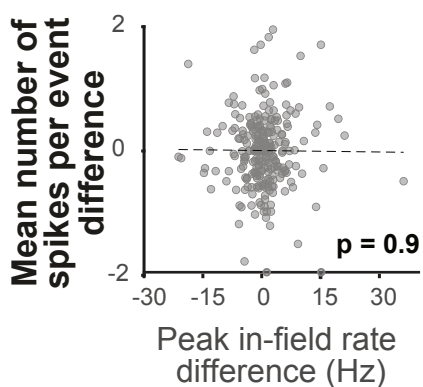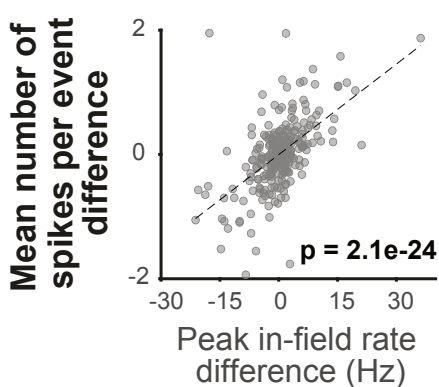**D**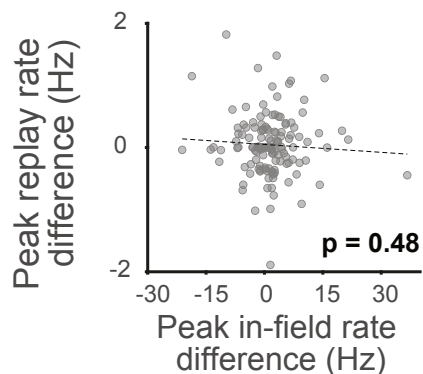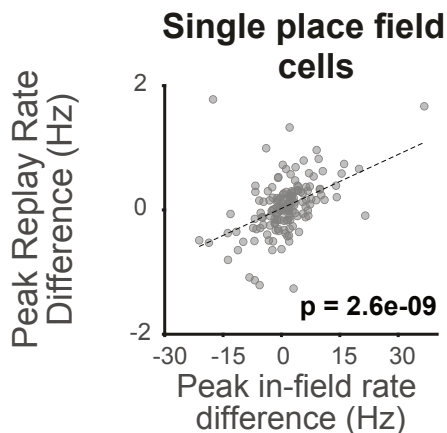

Supplement: supp [file elife-79031-supp-v1.zip]

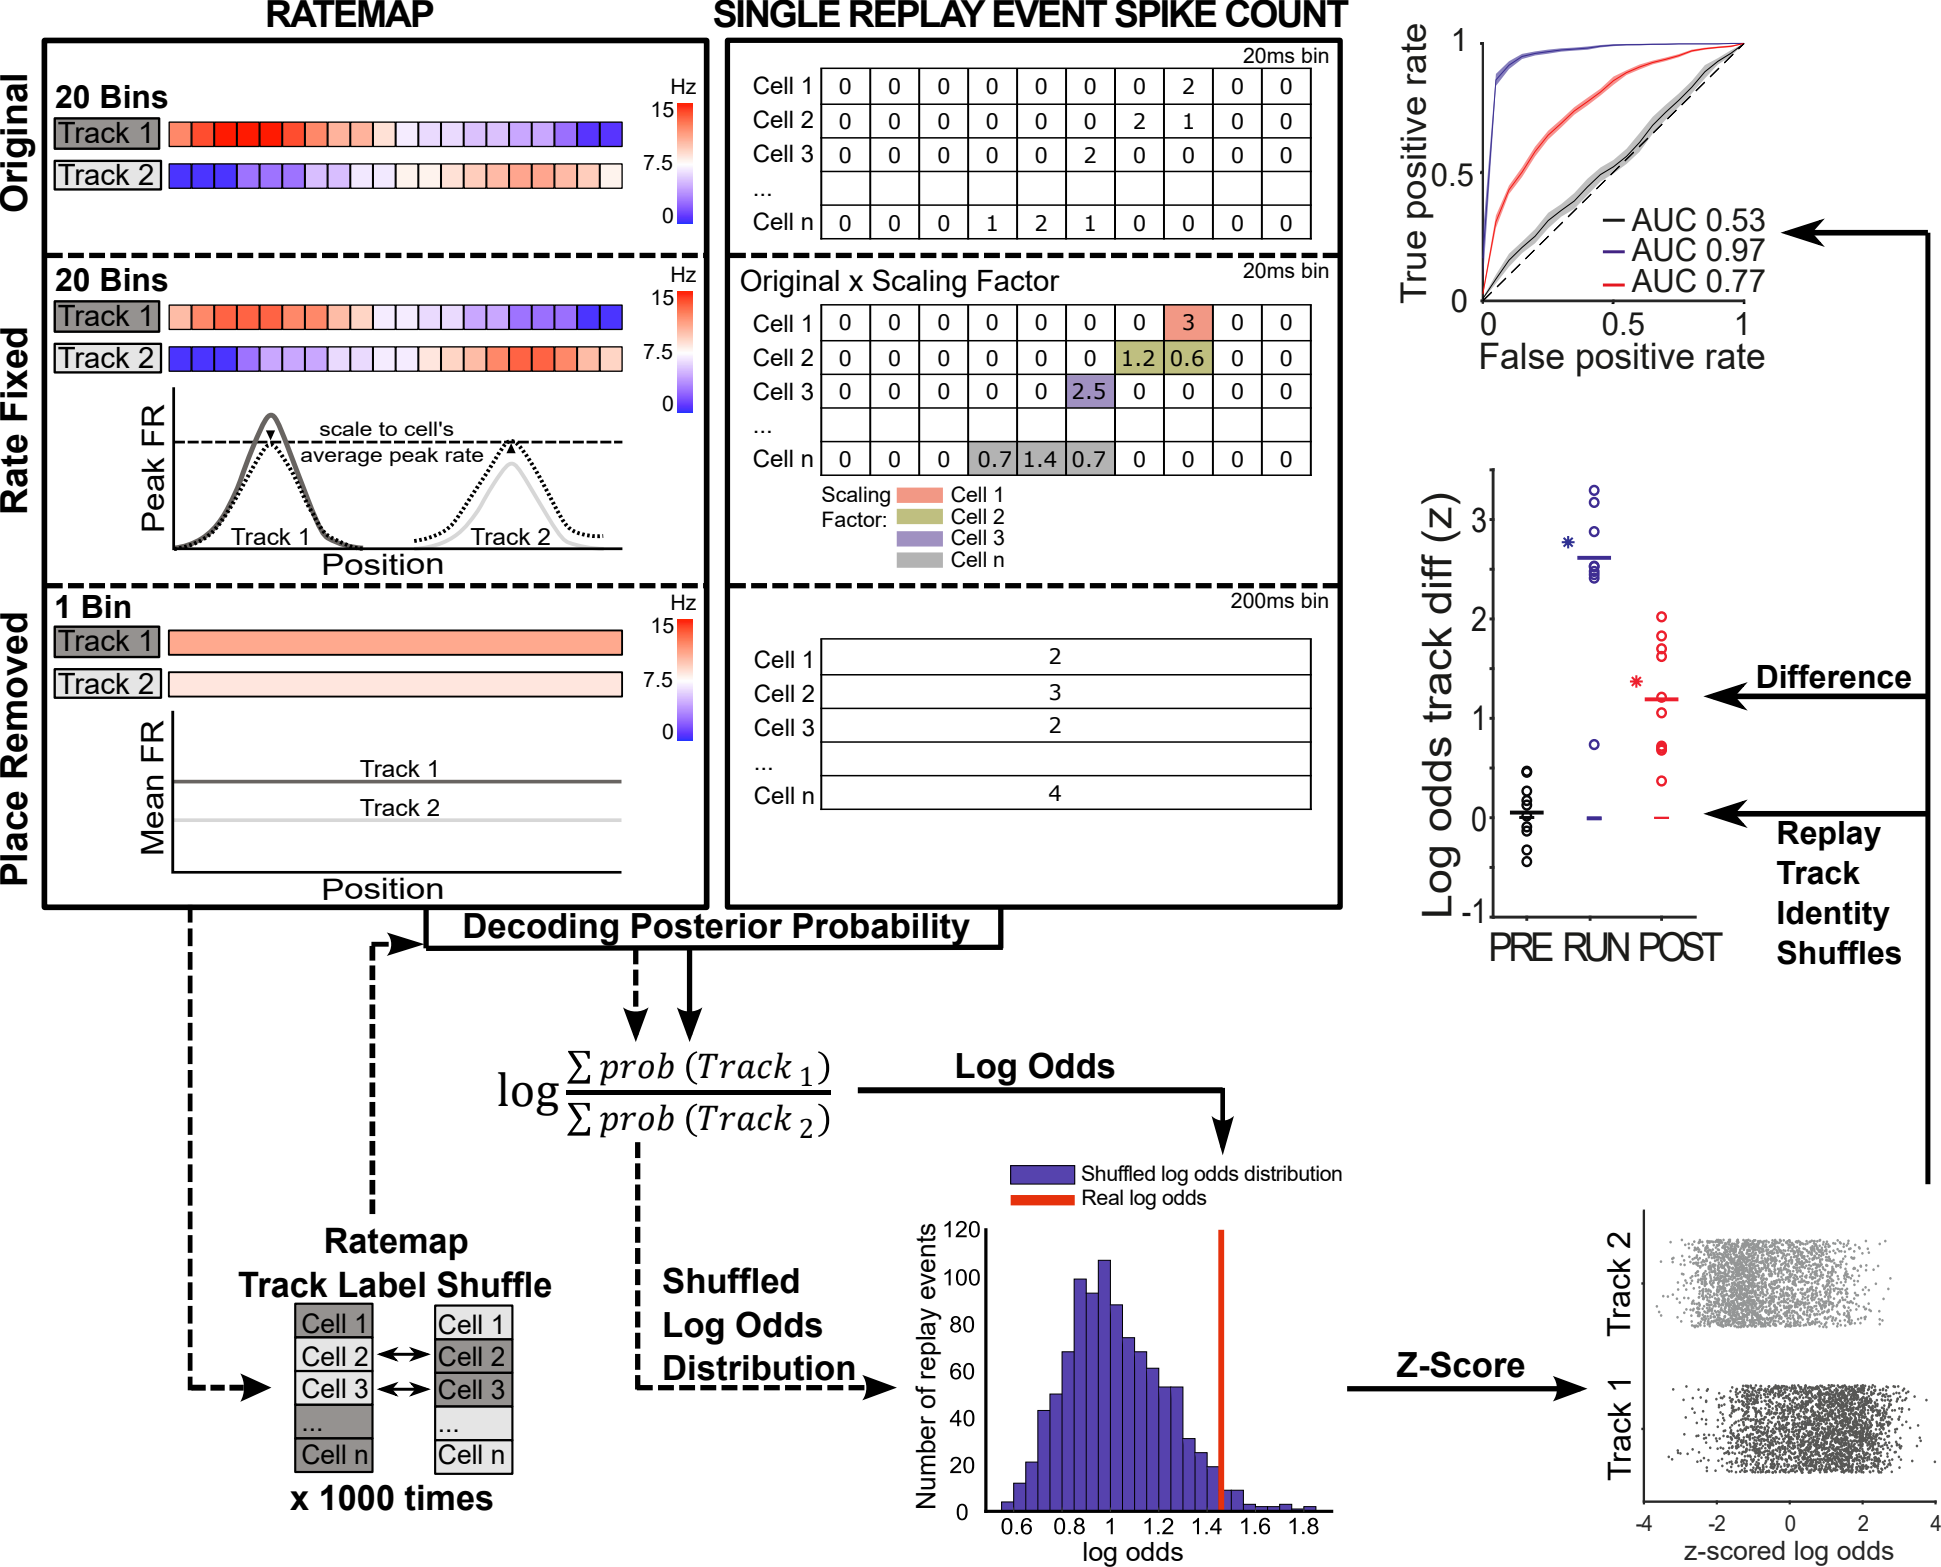

Supplement: supp [file elife-79031-supp-v1.zip]

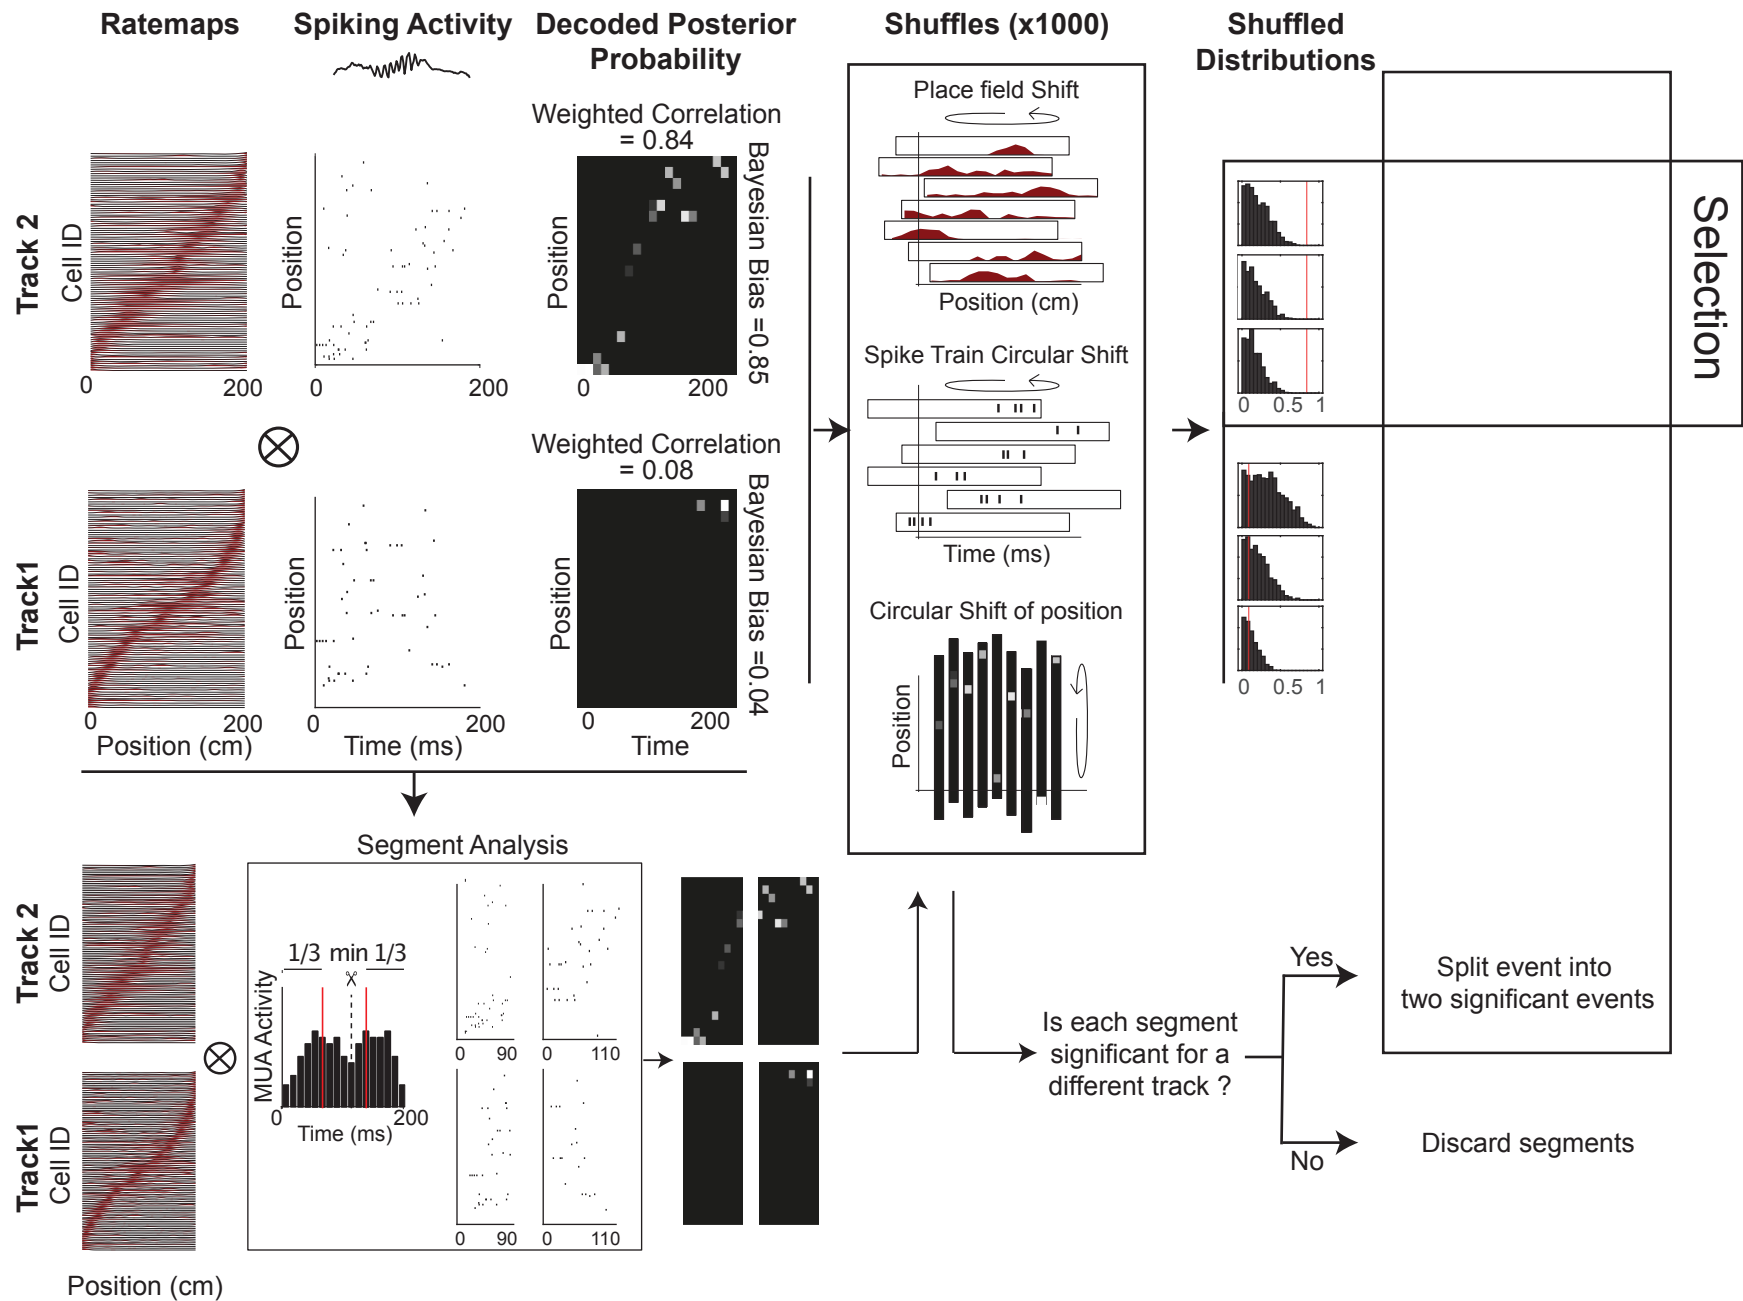

Supplement: supp [file elife-79031-supp-v1.zip]

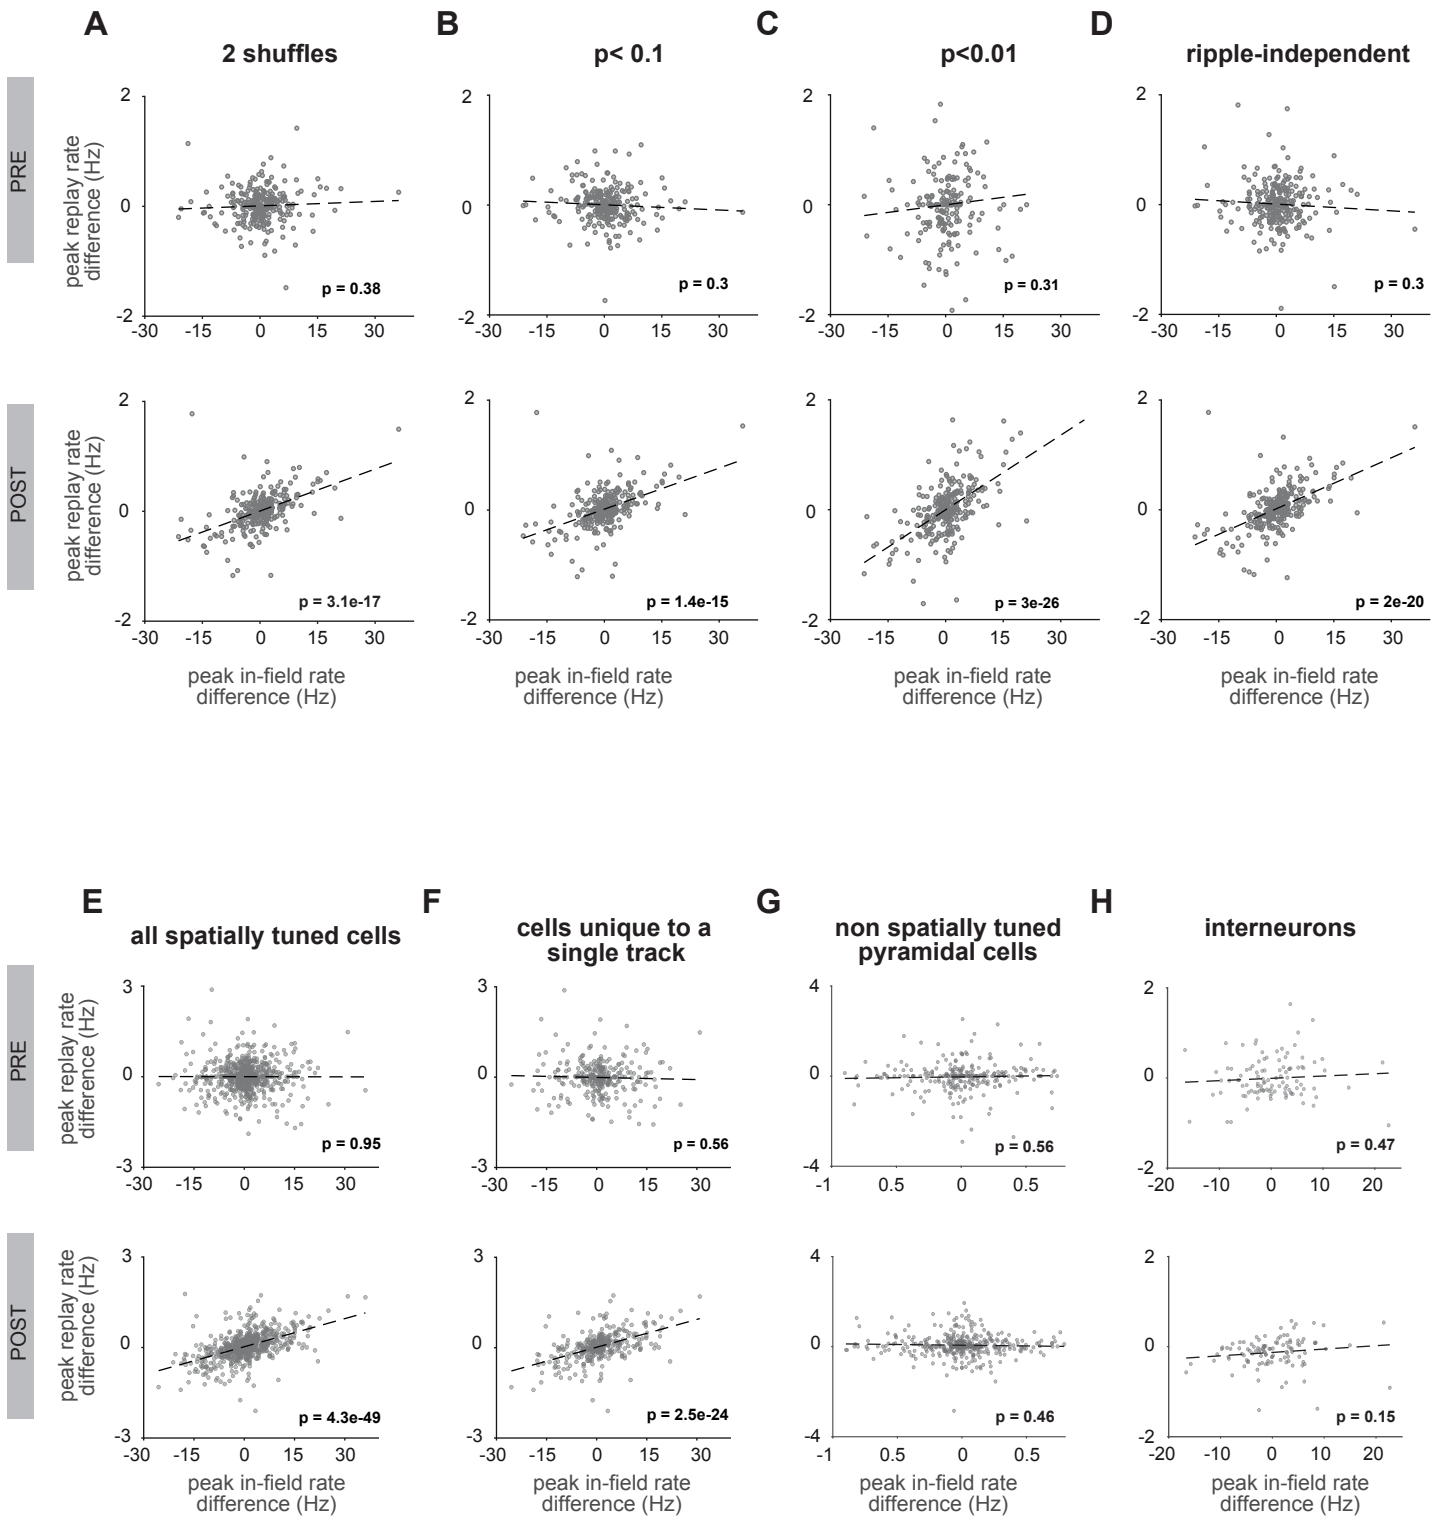

Supplement: supp [file elife-79031-supp-v1.zip]

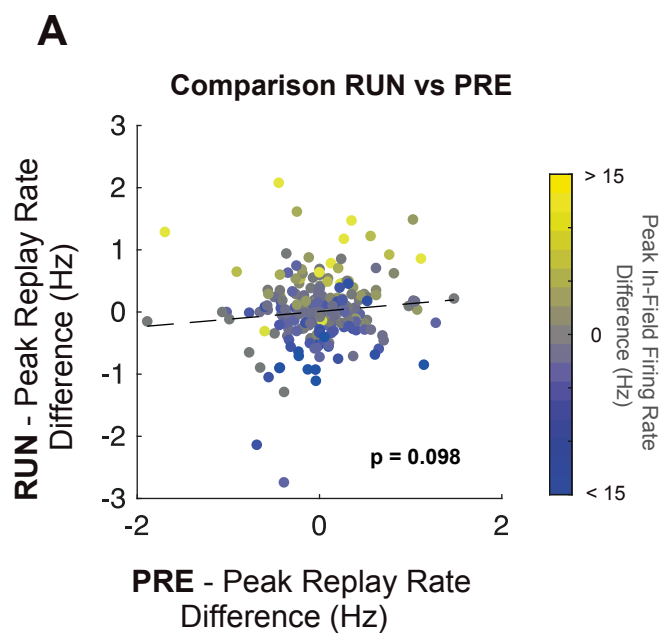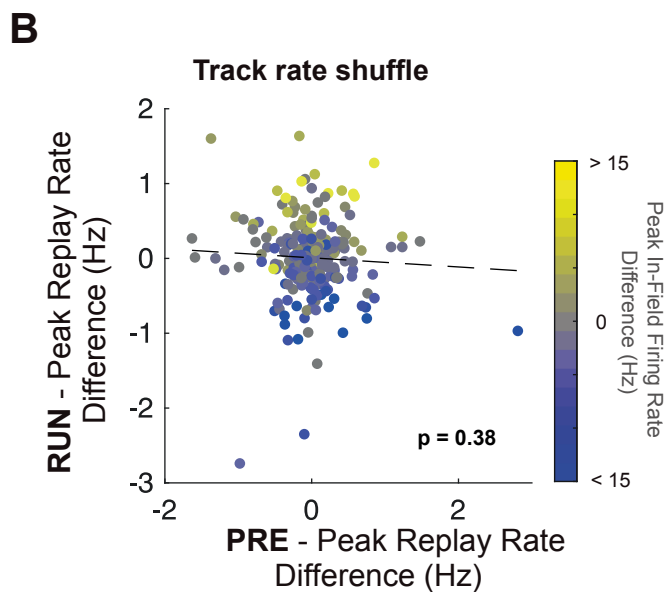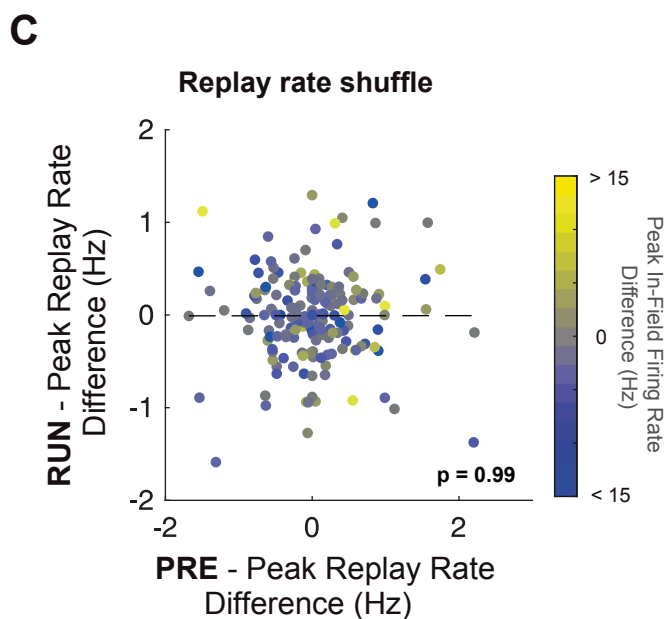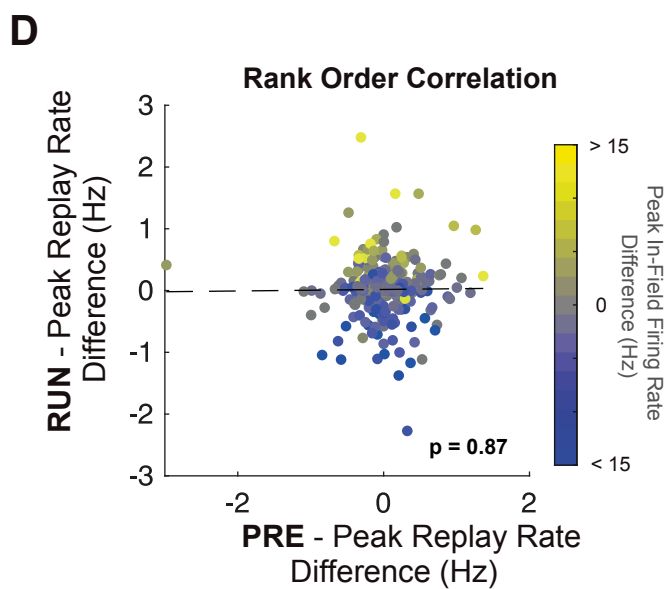

Supplement: supp [file elife-79031-supp-v1.zip]

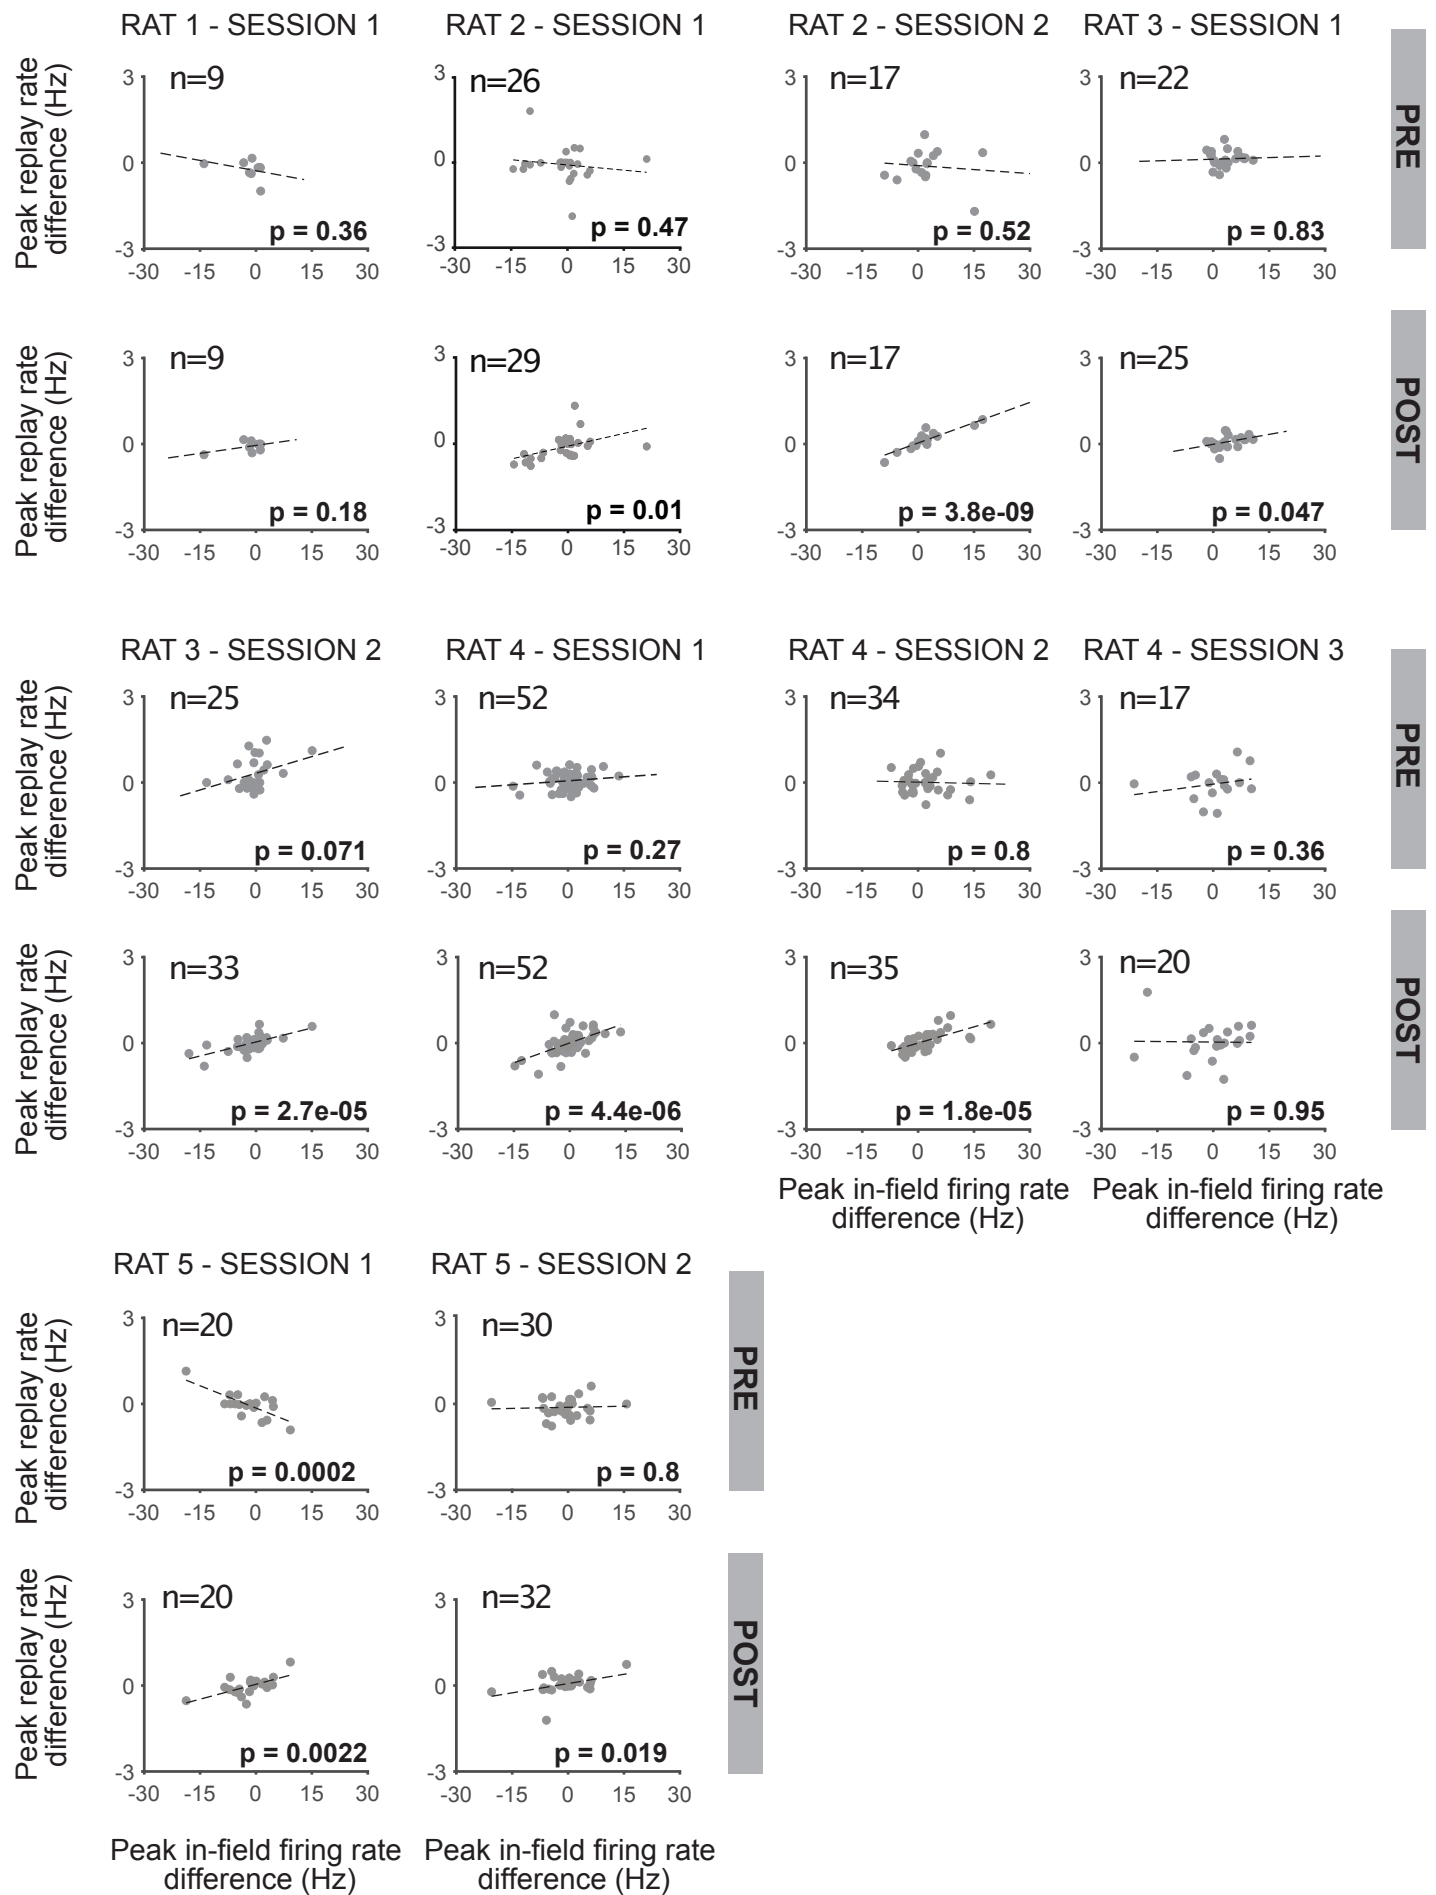

Supplement: supp [file elife-79031-supp-v1.zip]

**A**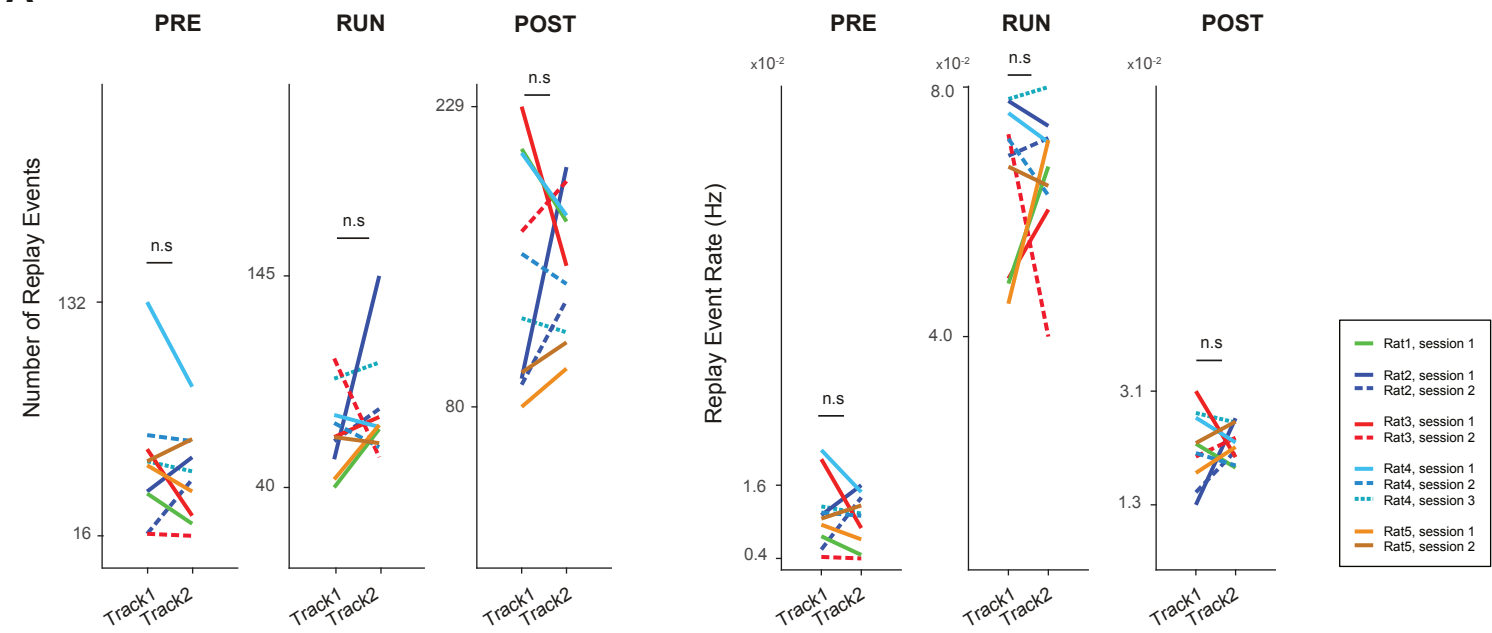**B**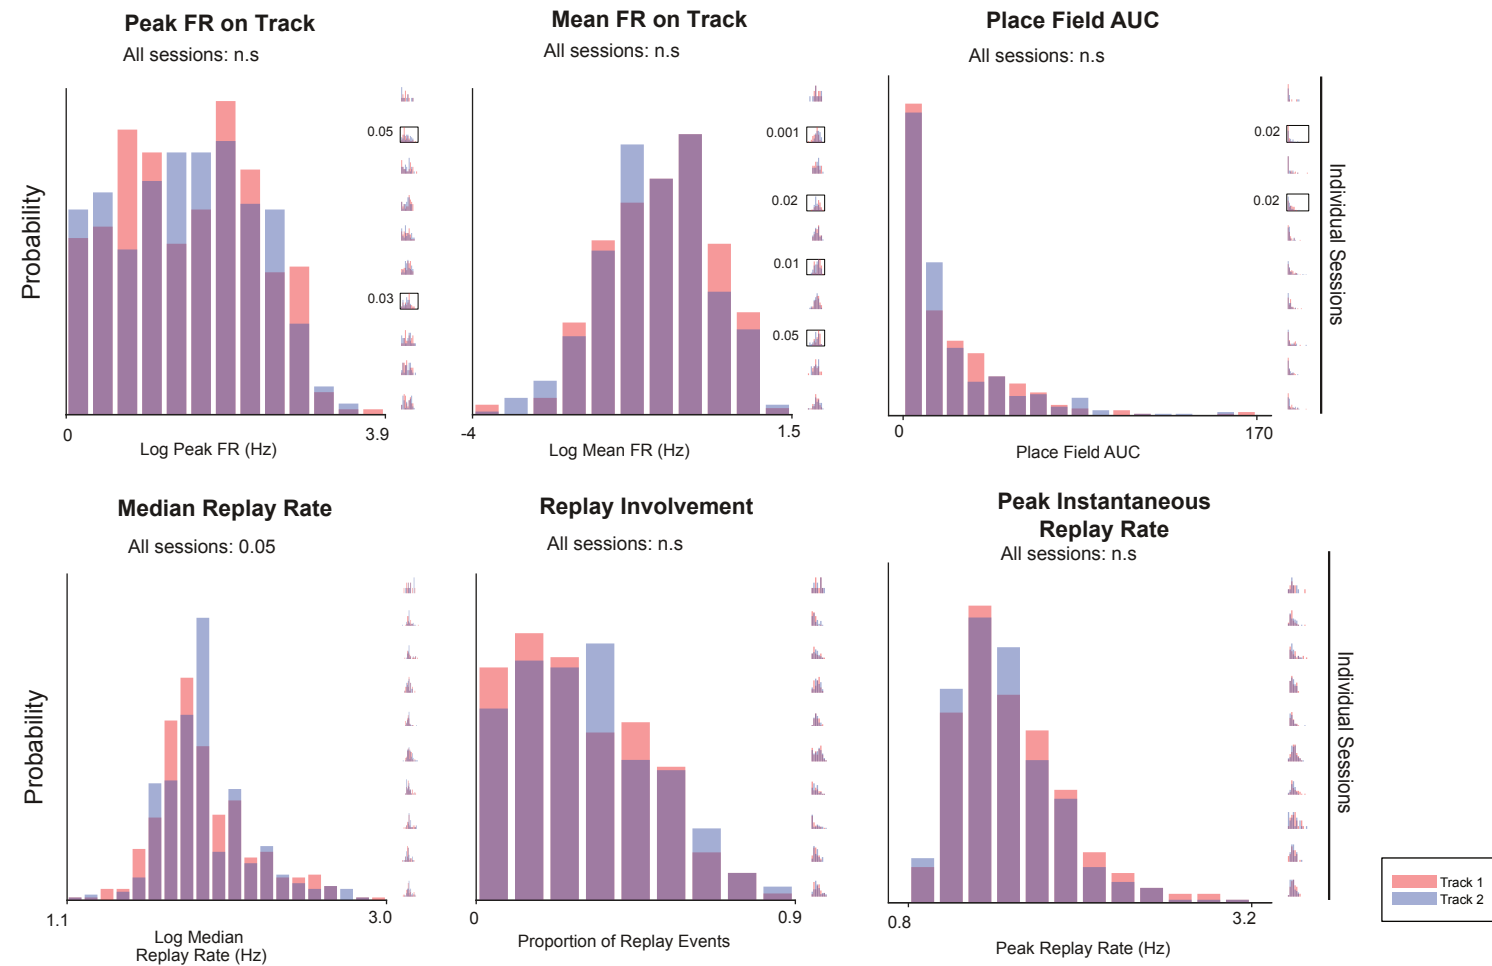

Supplement: supp [file elife-79031-supp-v1.zip]

**A**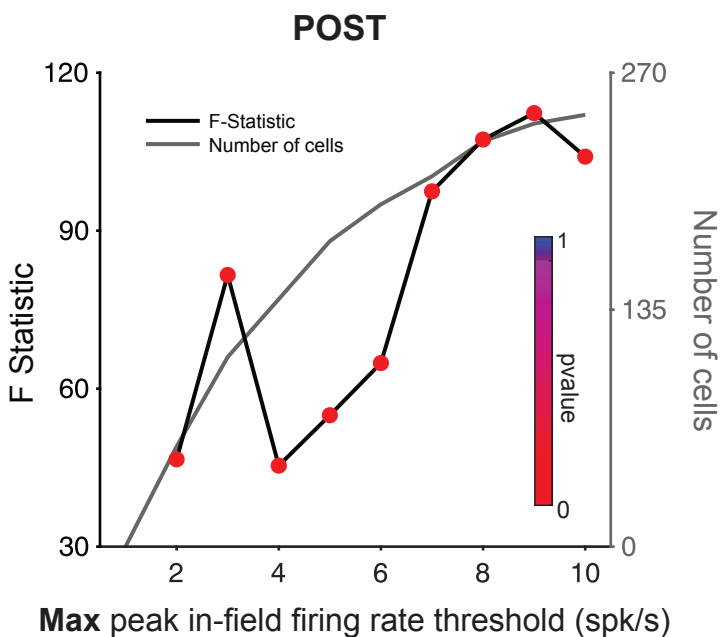**B**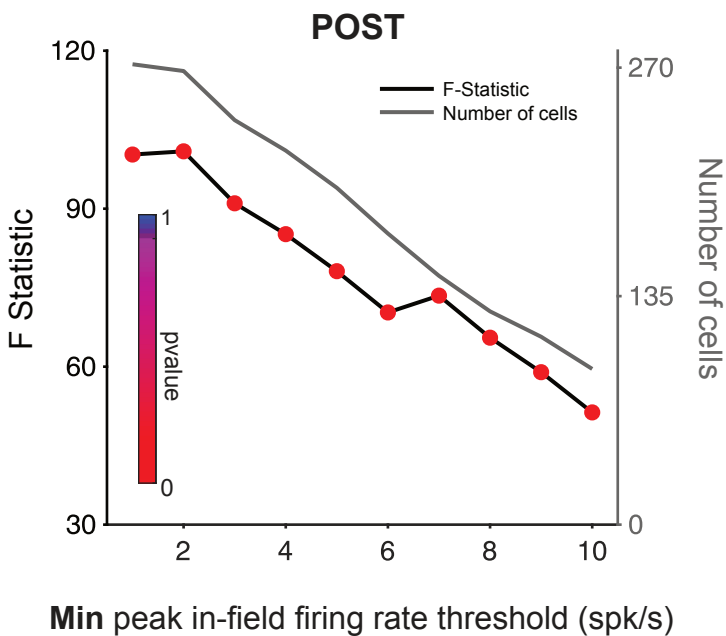

Supplement: supp [file elife-79031-supp-v1.zip]

**A**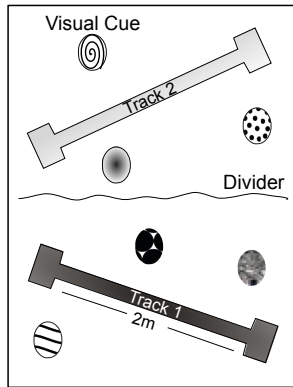**B**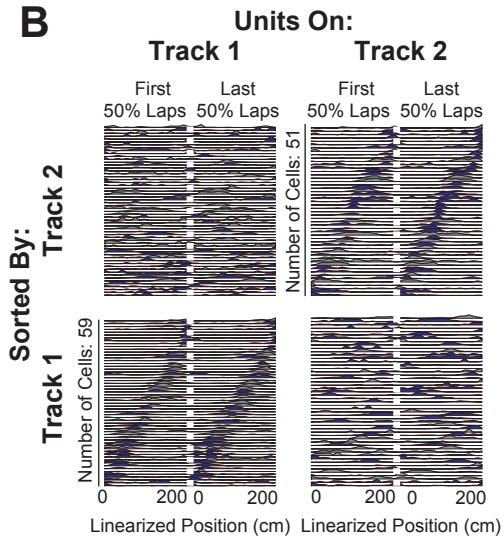**C**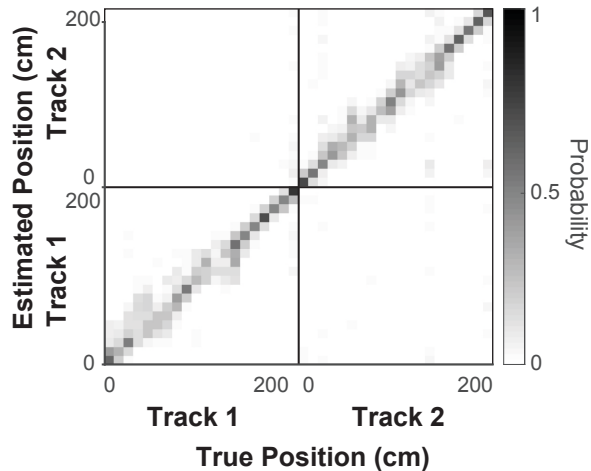

Supplement: supp [file elife-79031-supp-v1.zip]
